# Supplementary material for: Vitamin D Supplementation Enhances C18(dihydro)ceramide Levels in Type 2 Diabetes Patients
Source: PubMed Central journal article supplement (PMC5536020; doi:10.3390/ijms18071532), 2017-07-15
Supplement: ijms-18-01532-s001.pdf [file ijms-18-01532-s001.pdf]

# Vitamin D Supplementation Enhances C18(dihydro)ceramide Levels in Type 2 Diabetes Patients

**Table S1.** Plasma sphingolipid concentrations at baseline.

|             | Placebo          | Verum            | p-value |
|-------------|------------------|------------------|---------|
| C24dhCer    | 115 (82.8-164)   | 116 (85.1-144)   | 0.611   |
| C24:1dhCer  | 91.4 (63.4-126)  | 103 (71.0-125)   | 0.462   |
| C16Cer      | 86.1 (62.0-99.5) | 80.3 (66.8-95.8) | 0.958   |
| C20Cer      | 65.5 (45.0-96.9) | 62.8 (47.3-111)  | 0.633   |
| C24Cer      | 2447 (1845-2929) | 2173 (1691-2410) | 0.091   |
| C24:1Cer    | 793 (702-1265)   | 858 (728-1076)   | 0.982   |
| Sphinganine | 2.11 (1.07-3.21) | 2.18 (1.44-2.85) | 0.987   |
| Sphingosine | 5.47 (3.98-7.48) | 5.24 (3.96-7.26) | 0.826   |
| dhS1P       | 34.0 (20.9-42.4) | 34.1 (27.1-43.6) | 0.643   |
| S1P         | 236 (200-281)    | 211 (171-239)    | 0.070   |

Median (IQR); mg/ml; n = 28 (placebo group), n = 31 (verum group); Mann Whitney U test. Missing data: sphinganine: n = 27 (placebo group), n = 30 (verum group). Abbreviations: dhCer, dihydroceramide; Cer, ceramide; dhS1P, sphinganine 1-phosphate; S1P, sphingosine 1-phosphate.

**Table S2.** Plasma sphingolipid concentrations at follow-up.

|             | Placebo          | Verum            | p-value |
|-------------|------------------|------------------|---------|
| C24dhCer    | 107 (74.1-154)   | 100 (77.3-157)   | 0.994   |
| C24:1dhCer  | 78.1 (53.8-111)  | 80.9 (58.8-113)  | 0.519   |
| C16Cer      | 65.5 (54.3-96.2) | 77.4 (60.2-90.6) | 0.351   |
| C20Cer      | 56.1 (45.6-78.2) | 69.0 (46.5-84.7) | 0.200   |
| C24Cer      | 2044 (1614-2412) | 1838 (1531-2310) | 0.539   |
| C24:1Cer    | 632 (458-912)    | 691 (570-888)    | 0.452   |
| Sphinganine | 3.13 (2.42-4.36) | 3.88 (2.77-4.79) | 0.222   |
| Sphingosine | 7.74 (3.32-12.5) | 9.22 (6.08-16.3) | 0.375   |
| dhS1P       | 42.7 (27.6-54.4) | 36.0 (26.3-41.8) | 0.174   |
| S1P         | 196 (127-228)    | 172 (153-226)    | 0.814   |

Median (IQR); mg/ml; n = 28 (placebo group), n = 31 (verum group); Mann Whitney U test. Abbreviations: dhCer, dihydroceramide; Cer, ceramide; dhS1P, sphinganine 1-phosphate; S1P, sphingosine 1-phosphate.
